# Supplementary material
Source: PubMed Central journal article supplement (PMC2682988)
Supplement: jn.109.104968_1.pdf [file jn.109.104968_1.pdf]

**Supplemental Table 1. Aggregation of food items in the FFQ.**

| Foods or food groups                   | Food items                                                                                                                                                           |
|----------------------------------------|----------------------------------------------------------------------------------------------------------------------------------------------------------------------|
| White bread                            | White bread, low fibre bread, baguettes, ciabatta                                                                                                                    |
| Dark bread                             | Fibre bread, whole-grain bread                                                                                                                                       |
| Butter                                 | Butter, low-fat butter, melted butter                                                                                                                                |
| Margarines                             | Normal margarine, low-fat margarine                                                                                                                                  |
| Cheese                                 | Whey cheese goat milk, hard cheese, cream cheese, blue cheese, other kinds of cheese, regular and low fat                                                            |
| Fish spread                            | Roe spread, mackerel/sardine in tomato sauce, sardine in oil, herring, pickled, shrimp, crab                                                                         |
| Fish liver and roe                     | Fish liver, fish roe (dinner)                                                                                                                                        |
| Meat spread/meat cuts                  | Liver paste, ham, roast beef, cold cuts of lamb, calf, salami, Swedish sausage                                                                                       |
| Mayonnaise/dressing                    | Spread with mayonnaise (Italian etc.), Mayonnaise, remoulade, dressing, regular and low-fat (Thousand-island etc.)                                                   |
| Jam and honey                          | Jam, honey                                                                                                                                                           |
| Nut spread                             | Peanut butter, chocolate/nut spread                                                                                                                                  |
| Eggs                                   | Eggs, raw, cooked, scrambled                                                                                                                                         |
| High grain cereals                     | High grain cereals (müsli), oat flakes, oat flake porridge                                                                                                           |
| Corn flakes                            | Corn flakes                                                                                                                                                          |
| Full-fat milk                          | Full-fat milk, fermented full-fat milk, Crème Fraîche                                                                                                                |
| Low-fat milk                           | Low-fat milk, skimmed milk, fermented skimmed milk, chocolate milk                                                                                                   |
| Probiotic milk and yoghurt             | Biola milk, Biola yoghurt                                                                                                                                            |
| Yoghurt                                | Yoghurt full-fat and low-fat                                                                                                                                         |
| Fruit juice                            | Orange juice, apple juice etc.                                                                                                                                       |
| Artificially sweetened drinks          | Artificially sweetened soft drinks and carbonated drinks                                                                                                             |
| Sugar-sweetened drinks                 | Sugar sweetened soft drinks and carbonated drinks, Fruit syrup                                                                                                       |
| Coffee                                 | Coffee, instant, boiled/press, Cafe latte, cappuccino, Espresso                                                                                                      |
| Coffee alternatives                    | Decaffeinated coffee, Fig/barley/chicory coffee                                                                                                                      |
| Black tea                              | Tea, ordinary, fruit tea                                                                                                                                             |
| Herb tea                               | Green tea, rosehip tea, herb tea                                                                                                                                     |
| Water                                  | Tap water, mineral water, non-specified water                                                                                                                        |
| Processed meat                         | Meat sauce for pasta dishes, sausages, hot-dogs, meat balls, meat loaf, hamburger, meat patty, minced meat, beef/pork/lamb stew                                      |
| Red meat and game                      | Red meats; beef, pork, lamb, veal, venison                                                                                                                           |
| Offal                                  | Liver, kidney, other offal, hashed lungs                                                                                                                             |
| Poultry                                | Chicken and turkey fillet, chicken and/or turkey sausage, pan fried/baked/boiled chicken or turkey, chicken schnitzel, nuggets, other poultry (duck, goose, ostrich) |
| Lean fish                              | Cod, saithe, haddock, Pollock, halibut, plaice, flounder, tuna, perch, pike, cat fish                                                                                |
| Oily fish                              | Mackerel, herring, salmon, trout                                                                                                                                     |
| Processed fish                         | Fish burger, fish soufflé                                                                                                                                            |
| Pizza and taco                         | Pizza, frozen and homemade, taco                                                                                                                                     |
| Potatoes                               | Potatoes (boiled, baked, mashed), Creamed potatoes, potato casserole                                                                                                 |
| French fries, fried potatoes           | French fries, fried potatoes                                                                                                                                         |
| Rice, millet, couscous                 | Rice (normal, whole), millet, couscous                                                                                                                               |
| Pasta                                  | Spaghetti, macaroni, noodles                                                                                                                                         |
| Ketchup                                | Tomato ketchup                                                                                                                                                       |
| Olive oil                              | Olive oil                                                                                                                                                            |
| Cooking oil                            | Soya oil, sunflower oil, rape seed oil, corn oil                                                                                                                     |
| Raw vegetables, roots, peppers, celery | Raw vegetables: grated carrot/swede/cabbage, peppers, blanched celery, avocado, cauliflower, broccoli                                                                |

---

|                                             |                                                                                                                                                                            |
|---------------------------------------------|----------------------------------------------------------------------------------------------------------------------------------------------------------------------------|
| Green leaf vegetables,<br>tomato & cucumber | Green salad (lettuce, rucola, endives, spinach, chicory), tomato and<br>cucumber, maize as salad                                                                           |
| Cooked vegetables                           | Frozen vegetables, aubergine, cauliflower, broccoli, asparagus, green<br>peas, carrot, cabbage, swede, peppers, Brussels sprouts, zucchini, green<br>beans                 |
| Onion, leek, garlic                         | Garlic, onion, leek, spring onion                                                                                                                                          |
| Milk and meat alternatives                  | Milk substitutes (soya/rice/oat milk), soya sausage, soya burger, tartex                                                                                                   |
| Mushrooms                                   | Mushrooms                                                                                                                                                                  |
| Fruits and berries                          | Orange, apple, banana, pear, plum, grape, peach, nectarine, grapefruit,<br>mango, melon, papaya, kiwi, strawberries, raspberries, blueberries                              |
| Dried fruit                                 | Apricot, raisin, prune, fig, date                                                                                                                                          |
| Ice-cream and pudding                       | Chocolate pudding, ice-cream, custard, yoghurt ice-cream                                                                                                                   |
| Waffles and pancakes                        | Waffles and pancakes                                                                                                                                                       |
| Buns and rolls                              | Sweet buns and sweet rolls                                                                                                                                                 |
| Cakes                                       | Danish pastry, doughnut, sponge cake, chocolate cake, cream layer<br>cake                                                                                                  |
| Sweets and chocolate                        | Plain chocolate, fancy and filled chocolate, caramel, candies, licorice,<br>jelly sweets, marshmallow, marzipan, pastilles with sugar, artificially<br>sweetened pastilles |
| Salty snacks                                | Potato chips, peanuts/other nuts, popcorn                                                                                                                                  |
| Rice porridge/rice pudding                  | Rice porridge/rice pudding                                                                                                                                                 |
| Crisp bread                                 | Crisp bread, rye crisp, rusk                                                                                                                                               |
| Sweet biscuits                              | Cookies                                                                                                                                                                    |

---
